# Supplementary material for: Increased risk of revision of cementless stemmed total hip arthroplasty with metal-on-metal bearings: Data from the Nordic Arthroplasty Register Association
Source: PubMed Central journal article supplement — Acta Orthop. 2015 Jul 21;86(4):491–7. doi: 10.3109/17453674.2015.1023132 (PMC4513606; doi:10.3109/17453674.2015.1023132), 2015-07-21
Supplement: ORT-86-491-s7928.pdf [file ORT-86-491-s7928.pdf]

## Supplementary article data

# Increased risk of revision of cementless stemmed total hip arthroplasty with metal-on-metal bearings

## Data from the Nordic Arthroplasty Register Association

Claus VARNUM<sup>1,2,3</sup>, Alma B PEDERSEN<sup>4</sup>, Keijo MÄKELÄ<sup>5</sup>, Antti ESKELINEN<sup>6</sup>, Leif Ivar HAVELIN<sup>7,8</sup>, Ove FURNES<sup>7,8</sup>, Johan KÄRRHOLM<sup>9,10</sup>, Göran GARELLICK<sup>9,10</sup>, and Søren OVERGAARD<sup>2,3</sup>

<sup>1</sup> Department of Orthopaedic Surgery, Section for Hip and Knee Replacement, Vejle Hospital, Vejle; <sup>2</sup> Clinical Institute, University of Southern Denmark, Odense; <sup>3</sup> Department of Orthopaedic Surgery and Traumatology, Odense University Hospital, Odense; <sup>4</sup> Department of Clinical Epidemiology, Aarhus University Hospital, Aarhus, Denmark; <sup>5</sup> Department of Orthopaedics and Traumatology, Turku University Hospital, Turku; <sup>6</sup> Coxa Hospital for Joint Replacement, Tampere, Finland; <sup>7</sup> The Norwegian Arthroplasty Register, Department of Orthopedic Surgery, Haukeland University Hospital, Bergen; <sup>8</sup> Department of Clinical Medicine, Faculty of Medicine and Dentistry, University of Bergen, Bergen, Norway; <sup>9</sup> Swedish Hip Arthroplasty Register; <sup>10</sup> Institute of Clinical Sciences, Department of Orthopaedics, Sahlgrenska University Hospital, Gothenburg, Sweden.

Correspondence: clausvarnum@gmail.com

Submitted 2014-08-20. Accepted 2015-01-06.

Table 2. Crude and adjusted relative risk (RR) of revision for any reason, with 95% confidence intervals (CIs), in total hip arthroplasty (THA) with metal-on-metal (MoM) and metal-on-polyethylene (MoP) bearings. MoP bearings were considered the "standard" for THAs

|                                                 | Patients at the beginning of the year (n) | Revisions performed within the year (%) | Crude RR (95% CI) | Adjusted RR (95% CI) |
|-------------------------------------------------|-------------------------------------------|-----------------------------------------|-------------------|----------------------|
| At 1-year follow-up (0–1 year postoperatively)  |                                           |                                         |                   |                      |
| MoM                                             | 11,567                                    | 198 (1.7)                               | 0.81 (0.68–0.95)  | 0.83 (0.70–1.00)     |
| MoP                                             | 21,111                                    | 448 (2.1)                               | 1 (ref.)          | 1 (ref.)             |
| At 2-year follow-up (1–2 years postoperatively) |                                           |                                         |                   |                      |
| MoM                                             | 11,295                                    | 91 (0.8)                                | 0.92 (0.80–1.06)  | 0.94 (0.81–1.09)     |
| MoP                                             | 20,495                                    | 123 (0.6)                               | 1 (ref.)          | 1 (ref.)             |
| At 3-year follow-up (2–3 years postoperatively) |                                           |                                         |                   |                      |
| MoM                                             | 9,640                                     | 66 (0.7)                                | 1.01 (0.89–1.15)  | 1.02 (0.89–1.18)     |
| MoP                                             | 15,653                                    | 72 (0.5)                                | 1 (ref.)          | 1 (ref.)             |
| At 4-year follow-up (3–4 years postoperatively) |                                           |                                         |                   |                      |
| MoM                                             | 7,251                                     | 44 (0.6)                                | 1.09 (0.96–1.23)  | 1.10 (0.96–1.26)     |
| MoP                                             | 11,976                                    | 45 (0.4)                                | 1 (ref.)          | 1 (ref.)             |
| At 5-year follow-up (4–5 years postoperatively) |                                           |                                         |                   |                      |
| MoM                                             | 4,638                                     | 49 (1.1)                                | 1.32 (1.17–1.50)  | 1.37 (1.19–1.57)     |
| MoP                                             | 9,137                                     | 22 (0.2)                                | 1 (ref.)          | 1 (ref.)             |
| At 6-year follow-up (5–6 years postoperatively) |                                           |                                         |                   |                      |
| MoM                                             | 2,466                                     | 18 (0.7)                                | 1.44 (1.27–1.63)  | 1.49 (1.30–1.71)     |
| MoP                                             | 6,811                                     | 19 (0.3)                                | 1 (ref.)          | 1 (ref.)             |

**Table 3. Median follow-up and revision rate for different designs of acetabular components in cementless metal-on-metal (MoM) total hip arthroplasty (THA). Crude and adjusted relative risk (RR) of revision for any reason at 6-year follow-up with 95% confidence intervals (CIs), compared to metal-on-polyethylene (MoP) bearings**

|                                                                                                     | n = 32,678 (%) | Median follow-up (IQR) | Any revision (n) | Risk time, years | Revision rate per 100 years (95% CI) | Crude RR (95% CI) | Adjusted RR (95% CI) |
|-----------------------------------------------------------------------------------------------------|----------------|------------------------|------------------|------------------|--------------------------------------|-------------------|----------------------|
| <b>Brands of acetabular components in MoM THAs compared to acetabular components in MoP THAs</b>    |                |                        |                  |                  |                                      |                   |                      |
| All MoP acetabular components                                                                       | 21,111 (65)    | 3.4 (2.0–5.8)          | 766              | 84,404           | 0.91 (0.85–0.97)                     | 1 (ref.)          | 1 (ref.)             |
| Recap                                                                                               | 5,384 (16)     | 3.3 (2.3–4.5)          | 152              | 18,172           | 0.84 (0.71–0.98)                     | 0.91 (0.78–1.07)  | 0.96 (0.81–1.15)     |
| M2a                                                                                                 | 2,652 (8)      | 4.7 (3.0–6.0)          | 103              | 11,671           | 0.88 (0.73–1.07)                     | 1.13 (0.86–1.48)  | 1.20 (0.91–1.58)     |
| Pinnacle                                                                                            | 925 (3)        | 2.9 (2.0–3.9)          | 31               | 2,779            | 1.12 (0.78–1.59)                     | 1.19 (0.88–1.62)  | 1.20 (0.86–1.66)     |
| ASR                                                                                                 | 759 (2)        | 3.9 (2.8–4.7)          | 100              | 2,872            | 3.48 (2.86–4.24)                     | 5.89 (4.72–7.34)  | 6.38 (4.99–8.15)     |
| Birmingham                                                                                          | 521 (2)        | 4.0 (2.9–5.0)          | 15               | 2,093            | 0.72 (0.43–1.19)                     | 1.23 (0.70–2.17)  | 1.34 (0.73–2.45)     |
| Durom                                                                                               | 497 (2)        | 3.2 (1.8–5.0)          | 18               | 1,692            | 1.06 (0.67–1.69)                     | 1.50 (0.91–2.47)  | 1.50 (0.88–2.57)     |
| Conserve Plus                                                                                       | 478 (1)        | 3.3 (2.7–4.0)          | 25               | 1,555            | 1.61 (1.09–2.38)                     | 1.83 (1.25–2.67)  | 1.70 (1.14–2.54)     |
| Others                                                                                              | 351 (1)        | 3.6 (2.8–4.6)          | 26               | 1,368            | 1.90 (1.29–2.79)                     | 2.41 (1.57–3.70)  | 2.38 (1.45–3.92)     |
| <b>Combinations of brands of acetabular and femoral components in MoM THAs compared to MoP THAs</b> |                |                        |                  |                  |                                      |                   |                      |
| All MoP THAs                                                                                        | 21,111 (65)    | 3.4 (2.0–5.8)          | 766              | 84,404           | 0.91 (0.85–0.97)                     | 1 (ref.)          | 1 (ref.)             |
| Recap/Bi-Metric                                                                                     | 4,990 (15)     | 3.2 (2.2–4.4)          | 138              | 16,652           | 0.83 (0.70–0.98)                     | 0.90 (0.76–1.06)  | 0.96 (0.80–1.15)     |
| M2a/Bi-Metric                                                                                       | 2,407 (7)      | 4.8 (3.0–6.1)          | 95               | 10,683           | 0.89 (0.73–1.09)                     | 1.16 (0.87–1.53)  | 1.25 (0.93–1.67)     |
| Pinnacle/Corail                                                                                     | 910 (3)        | 2.9 (2.0–3.9)          | 31               | 2,723            | 1.14 (0.80–1.62)                     | 1.21 (0.89–1.65)  | 1.25 (0.90–1.74)     |
| Conserve Plus/Profemur                                                                              | 418 (1)        | 3.2 (2.7–3.9)          | 18               | 1,315            | 1.37 (0.86–2.17)                     | 1.53 (1.00–2.33)  | 1.47 (0.95–2.27)     |
| ASR/Summit                                                                                          | 401 (1)        | 3.9 (2.8–4.8)          | 56               | 1,540            | 3.64 (2.80–4.72)                     | 6.35 (4.74–8.49)  | 7.27 (5.18–10.2)     |
| Birmingham/Synergy                                                                                  | 369 (1)        | 4.2 (3.4–5.1)          | 10               | 1,566            | 0.64 (0.34–1.19)                     | 1.07 (0.51–2.24)  | 1.26 (0.56–2.84)     |
| ASR/Corail                                                                                          | 307 (1)        | 3.7 (2.7–4.5)          | 35               | 1,117            | 3.13 (2.25–4.36)                     | 5.00 (3.54–7.07)  | 5.17 (3.53–7.56)     |
| Others                                                                                              | 1,765 (6)      | 3.7 (2.5–4.9)          | 87               | 6,606            | 1.32 (1.07–1.63)                     | 1.77 (1.39–2.26)  | 1.75 (1.29–2.36)     |

**Table 4. Stratified analyses with crude and adjusted relative risk (RR) of revision for any reason with 95% confidence intervals (CIs) at 6-year follow-up among total hip arthroplasties (THAs) with metal-on-metal (MoM) bearings**

|                                                                                                                                                                           | n = 11,567 (%) | Any revision (n) | Crude RR (95% CI) | Adjusted RR (95% CI) |
|---------------------------------------------------------------------------------------------------------------------------------------------------------------------------|----------------|------------------|-------------------|----------------------|
| <b>Brands of acetabular components in MoM THAs. As Recap was the most prevalent, it was used as reference</b>                                                             |                |                  |                   |                      |
| Recap                                                                                                                                                                     | 5,384 (47)     | 152              | 1 (ref.)          | 1 (ref.)             |
| M2a                                                                                                                                                                       | 2,652 (23)     | 103              | 1.24 (0.94–1.66)  | 1.82 (0.97–3.43)     |
| Pinnacle                                                                                                                                                                  | 925 (8)        | 31               | 1.31 (0.94–1.82)  | 1.41 (0.60–3.32)     |
| ASR                                                                                                                                                                       | 759 (7)        | 100              | 6.45 (5.03–8.28)  | 6.73 (4.95–9.14)     |
| Birmingham                                                                                                                                                                | 521 (4)        | 15               | 1.35 (0.76–2.41)  | 1.43 (0.73–2.81)     |
| Durom                                                                                                                                                                     | 497 (4)        | 18               | 1.65 (0.99–2.75)  | 1.57 (0.83–2.95)     |
| Conserve Plus                                                                                                                                                             | 478 (4)        | 25               | 2.00 (1.35–2.97)  | 1.77 (1.07–2.92)     |
| Others                                                                                                                                                                    | 351 (3)        | 26               | 2.64 (1.70–4.11)  | 2.57 (1.37–4.81)     |
| <b>Combination of brands of acetabular and femoral components in MoM THAs. The combination Recap/Bi-Metric was the most prevalent and was therefore used as reference</b> |                |                  |                   |                      |
| Recap/Bi-Metric                                                                                                                                                           | 4,990 (43)     | 138              | 1 (ref.)          | 1 (ref.)             |
| M2a/Bi-Metric                                                                                                                                                             | 2,407 (21)     | 95               | 1.29 (0.95–1.76)  | 2.11 (1.14–3.89)     |
| Pinnacle/Corail                                                                                                                                                           | 910 (8)        | 31               | 1.35 (0.97–1.88)  | 1.44 (0.49–4.22)     |
| Conserve Plus/Profemur                                                                                                                                                    | 418 (4)        | 18               | 1.71 (1.10–2.65)  | 1.57 (0.92–2.70)     |
| ASR/Summit                                                                                                                                                                | 401 (3)        | 56               | 7.09 (5.17–9.72)  | 8.15 (5.06–13.1)     |
| Birmingham/Synergy                                                                                                                                                        | 369 (3)        | 10               | 1.19 (0.56–2.53)  | 1.36 (0.53–3.51)     |
| ASR/Corail                                                                                                                                                                | 307 (3)        | 35               | 5.59 (3.88–8.06)  | 5.24 (3.39–8.09)     |
| Others                                                                                                                                                                    | 1,765 (15)     | 87               | 1.98 (1.51–2.60)  | 1.95 (1.22–3.10)     |

**Table 5. Distribution of femoral head size for different designs of acetabular components. Values are numbers of patients and percentages (%) within each acetabular component**

|               | Femoral head size, mm |            |          |            |            |            | Total  |
|---------------|-----------------------|------------|----------|------------|------------|------------|--------|
|               | ≤ 37                  | 38–39      | 40–43    | 44–47      | 48–51      | ≥ 52       |        |
| Recap         | 23 (0)                | 24 (0)     | 268 (5)  | 1,487 (28) | 2,116 (40) | 1,466 (27) | 5,384  |
| M2a           | 22 (1)                | 2,283 (86) | 3 (0)    | 76 (3)     | 150 (6)    | 118 (4)    | 2,652  |
| Pinnacle      | 695 (75)              | 1 (0)      | 196 (21) | 25 (3)     | 6 (1)      | 2 (0)      | 925    |
| ASR           | 14 (2)                | 3 (0)      | 37 (5)   | 298 (39)   | 258 (34)   | 149 (20)   | 759    |
| Birmingham    | 3 (1)                 | 1 (0)      | 63 (12)  | 184 (35)   | 179 (34)   | 91 (18)    | 521    |
| Durom         | 17 (3)                | 3 (1)      | 46 (9)   | 156 (31)   | 172 (35)   | 103 (21)   | 497    |
| Conserve Plus | 4 (1)                 | 0 (0)      | 50 (10)  | 146 (31)   | 184 (38)   | 94 (20)    | 478    |
| Others        | 171 (49)              | 2 (1)      | 16 (5)   | 59 (17)    | 59 (16)    | 44 (12)    | 351    |
| Total         | 949 (8)               | 2,317 (20) | 679 (6)  | 2,431 (21) | 3,124 (27) | 2,067 (18) | 11,567 |

**Table 7. Main indications for total hip arthroplasty (THA) revisions. For each type of THA bearing, the number and percentage (%) of the total number of THAs for each specific cause of revision is given. Bearings included metal-on-metal (MoM) and metal-on-polyethylene (MoP)**

|                                 | MoM         | MoP         | p-value |
|---------------------------------|-------------|-------------|---------|
|                                 | n = 470 (%) | n = 766 (%) |         |
| Aseptic loosening               | 218 (1.9)   | 121 (0.6)   | < 0.001 |
| Deep infection                  | 66 (0.6)    | 127 (0.6)   | 0.7     |
| Periprosthetic femoral fracture | 57 (0.5)    | 122 (0.6)   | 0.3     |
| Dislocation                     | 39 (0.3)    | 276 (1.3)   | < 0.001 |
| Pain only                       | 19 (0.2)    | 28 (0.1)    | 0.5     |
| Other                           | 71 (0.6)    | 92 (0.4)    | 0.03    |
